# Supplementary material for: Perovskite BaZrO3 hollow micro- and nanospheres: controllable fabrication, photoluminescence and adsorption of reactive dyes
Source: Royal Society of Chemistry journal article supplement (doi:10.1039/c0jm04534a), 2011-01-01
Supplement: c0jm04534a.pdf [file c0jm04534a.pdf]

**Perovskite BaZrO<sub>3</sub> Hollow Micro- and Nanospheres: Controllable  
Fabrication, Photoluminescence and Adsorption of reactive dyes**

Zhengkong Dong<sup>a</sup>, Tiannan Ye<sup>a</sup>, Yongnan Zhao<sup>\*a</sup>, Jianguo Yu<sup>a</sup>, Fengqin Wang,  
Shukun Guo and Yongcun Zou<sup>\*b</sup>

**Electronic Supplementary Information**

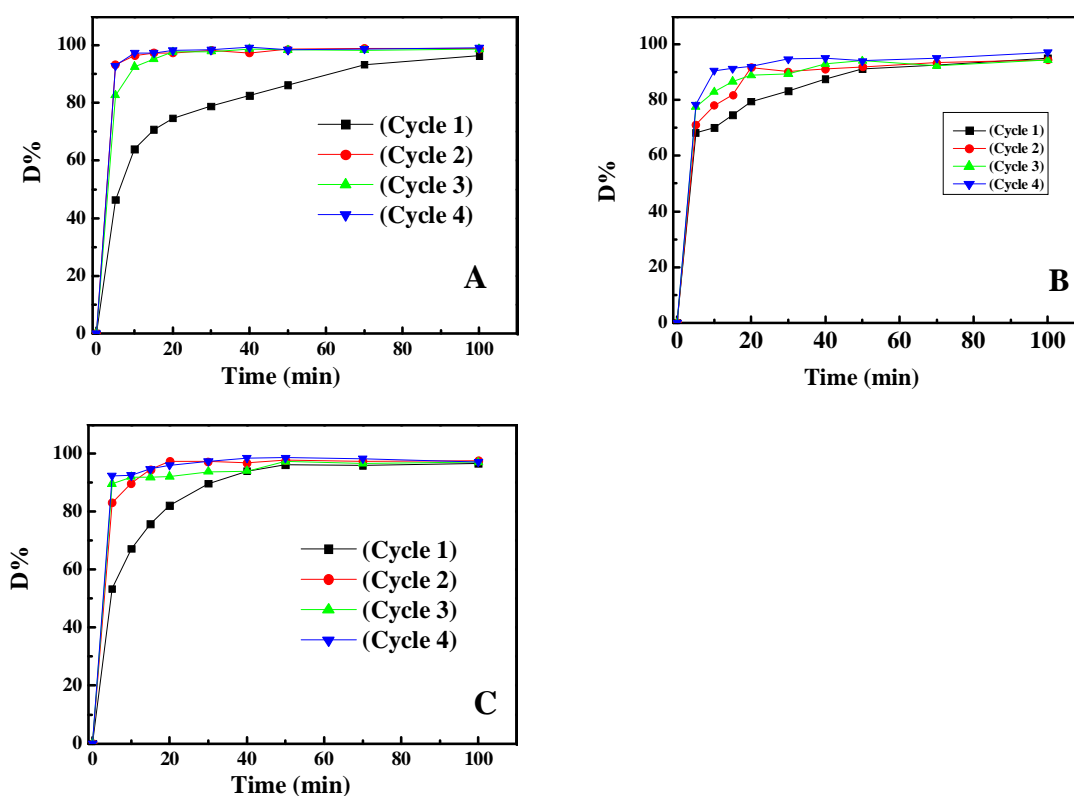

**Figure S1** Adsorption-desorption cycles for Agazol blue BF-GF 150% (a), reactive yellow RR (b), and reactive red KE-7B (c). Each adsorption experiment was performed by using the regenerated BaZrO<sub>3</sub> hollow nanospheres. All the tests were run in 500 mL 100 mg·L<sup>-1</sup> dye solutions.

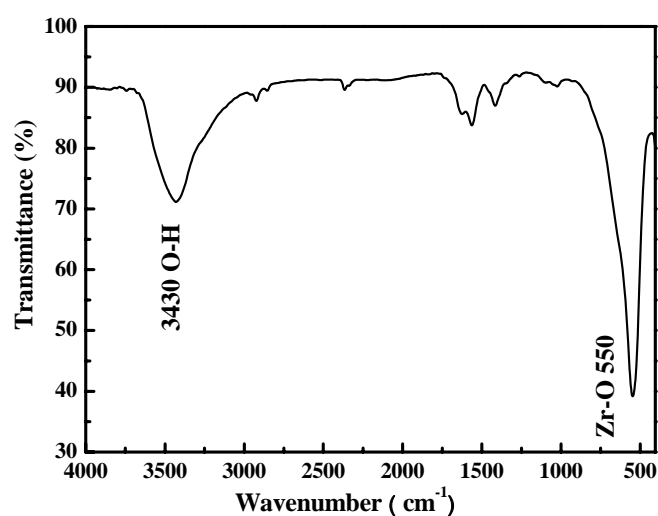

**Figure S2.** FTIR spectra of 200 °C annealed BaZrO<sub>3</sub> obtained at 200 °C in 16 mol·L<sup>-1</sup> KOH solution for 24hrs.
